# Supplementary material for: Electrocatalytic methanol oxidation with nanoporous gold: microstructure and selectivity
Source: Royal Society of Chemistry journal article supplement (doi:10.1039/c7nr05124g), 2017-01-01
Supplement: c7nr05124g1.pdf [file c7nr05124g1.pdf]

# Supporting Information for: Nanoporous Gold for Electrocatalytic Methanol Oxidation

Matthias Graf,\* Mareike Haensch, Jörg Carstens, Gunther Wittstock, and Jörg  
Weissmüller

E-mail: [matthias.graf@tuhh.de](mailto:matthias.graf@tuhh.de)

# Ag contents as derived by EDX vs. ICP-OES

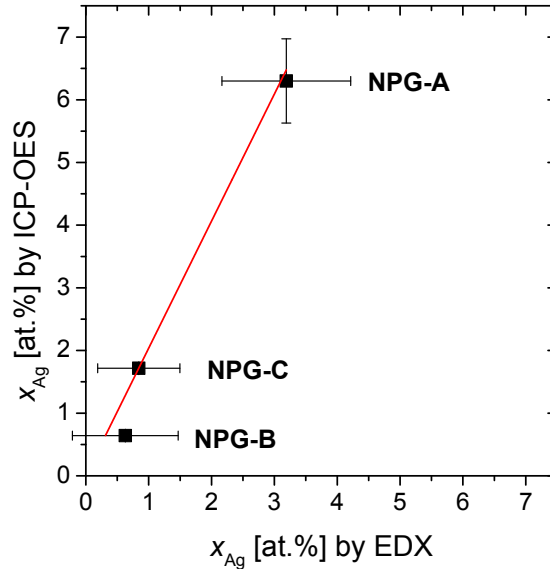

Figure 1: Residual Ag contents  $x_{\text{Ag}}$  in samples of nanoporous gold obtained by three different dealloying routes and determined via energy-dispersive X-ray (EDX) spectroscopy inside a scanning electron microscope vs.  $x_{\text{Ag}}$  as determined by inductively-coupled plasma optical emission spectroscopy (ICP-OES). Red line represents least-squares linear fit. Horizontal error bars from three repeated measurements at different sample spots of two different samples. Vertical error bars by two-fold repeated injection and two different samples.

Overall Ag concentration inside NPG samples was determined via inductively-coupled plasma optical emission spectroscopy (ICP-OES) using freshly prepared, cleaned (repeated rinsing in water) and dried (under vacuum) NPG samples (made as described in main text). After mass determination those were solubilized in *aqua regia* and diluted with water (NPG-A: 1:500, NPG-B and NPG-C: 1:100) to dissolve AgCl precipitates. After calibration each fusion was injected twice into an Optima 8300 DV ICP-OES instrument (Perkin Elmer) using Ar plasma excitation and Ag determination at 328.07 nm and each measurement replicated three times (standard deviation within one measurement below 4%). The error bars in Fig. 1 result from the averaging over two different samples from each dealloying route.

# XPS shift of Ag(0) in Ag-Au alloys as a function of $x_{\text{Ag}}$

Shifts of the Ag  $3d_{5/2}$  peak due to alloy effects of Ag with Au were screened using electrodeposited  $\text{Au}_{1-x}\text{Ag}_x$  alloy reference samples on sputtered Au substrates with  $x = 2 - 87$  at.%. Electrodeposition (according to Ji et al.<sup>1</sup>) was performed from  $(100 - x)$  mM  $\text{K}[\text{Au}(\text{CN})_2] + x$  mM  $\text{K}[\text{Ag}(\text{CN})_2] + 250$  mM  $\text{Na}_2\text{CO}_3$  at  $-1200$  mV vs. Ag/AgCl RE and Au wire CE for 15 min to generate a closed alloy layer which was cleaned in water and dried under air subsequently. EDX confirmed the composition of the samples.

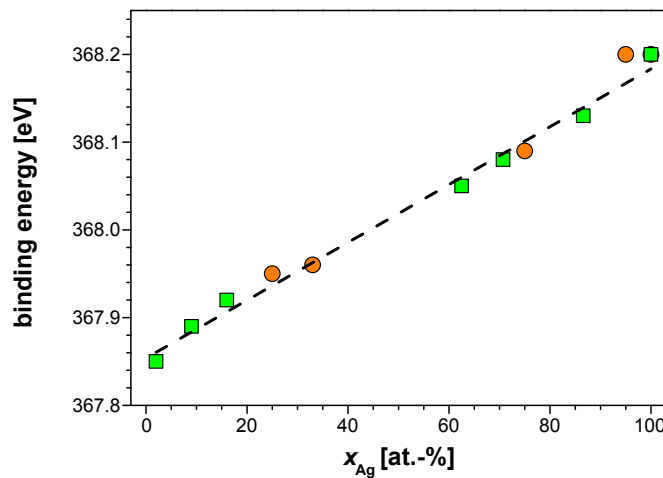

Figure 2: Reference samples of  $\text{Au}_{1-x}\text{Ag}_x$  alloys of different compositions  $x = 2 - 90$  at.% were prepared as well as a pure Ag sample and XP spectra were recorded. Ag  $3d_{5/2}$  peak shift for the different alloy compositions (squares) are shown as well as values for binding energy shifts for Ag  $3d_{5/2}$  peaks in different Ag-Au alloys from Ref.<sup>2</sup> (circles) are shown.

## References

- (1) Ji, C.; Searson, P. C. *Appl. Phys. Lett.* **2002**, *81*, 4437–4439.
- (2) Tyson, C.; Bzowski, A.; Kristof, P.; Kuhn, M.; Sammynaiken, R.; Sham, T. *Phys. Rev. B* **1992**, *45*, 8924–8928.
